# Supplementary material for: AFF2 Is Associated With X-Linked Partial (Focal) Epilepsy With Antecedent Febrile Seizures
Source: PubMed Central journal article supplement (PMC9006616; doi:10.3389/fnmol.2022.795840), 2022-03-30
Supplement: Data_Sheet_1.pdf [file Data_Sheet_1.pdf]

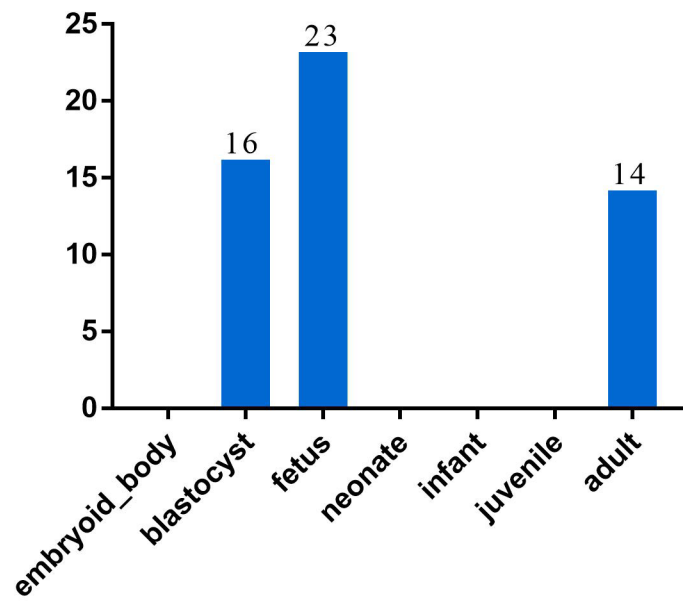

**Supplementary Figure 1. Gene expression level in different stages.** The data was from Unigene database in NCBI.

Supplementary Table 1. Summary of genetic and phenotypic features of the cases with *AFF2* mutations

| Mutation type         | Mutation          | Inheritance | Exon | Age of seizure onset | Sex | ID | GDD | ASD | EP | Reference                            |
|-----------------------|-------------------|-------------|------|----------------------|-----|----|-----|-----|----|--------------------------------------|
| <b>Point variants</b> |                   |             |      |                      |     |    |     |     |    |                                      |
| <b>Missense</b>       | c.230A>T/p.N77I   | maternal    | 3    | 14mo                 | M   | —  | —   | —   | +  | This study                           |
|                       | c.391C>T/p.H131Y  | maternal    | 3    | 2yr                  | M   | —  | —   | —   | +  | This study                           |
|                       | c.1445G>C/p.G482A | maternal    | 10   | —                    | M   | +  | —   | —   | —  | Farwell (2015)(Farwell et al., 2015) |
|                       | c.1540C>T/p.R514C | maternal    | 10   | 18mo                 | M   | —  | —   | —   | +  | This study                           |
|                       | c.1640G>A/p.G547D | maternal    | 11   | 6yr                  | M   | +  | —   | —   | +  | Zhang (2015)(Zhang et al., 2015)     |
|                       | c.1979G>C/p.S660T | maternal    | 11   | —                    | M   | —  | —   | +   | —  | Mondal (2012)(Mondal et al., 2012)   |
|                       | c.2009G>A/p.R670H | maternal    | 11   | 10mo                 | M   | —  | —   | —   | +  | This study                           |
|                       | c.2074C>G/p.P692A | maternal    | 11   | 8yr                  | M   | —  | —   | —   | +  | This study                           |
|                       | c.2140G>A/p.D714N | maternal    | 11   | —                    | M   | —  | —   | +   | —  | Mondal (2012)(Mondal et al., 2012)   |
|                       | c.2509C>T/p.R837C | maternal    | 11   | —                    | M   | —  | —   | +   | —  | Mondal (2012)(Mondal et al., 2012)   |

|                              |                             |                |    |   |   |   |   |   |   |                                          |
|------------------------------|-----------------------------|----------------|----|---|---|---|---|---|---|------------------------------------------|
|                              | c.2780G>A/p.R927H           | maternal       | 13 | — | M | — | — | + | — | Mondal (2012)(Mondal et al., 2012)       |
|                              | c.3088A>C/p.I1030L          | <i>De novo</i> | 14 | — | M | — | — | + | — | Mondal (2012)(Mondal et al., 2012)       |
|                              | c.3739G>A/p.V1247I          | maternal       | 20 | — | M | — | — | + | — | Jiang (2013)(Jiang et al., 2013)         |
| <b>Nonsense</b>              | c.847C>T/p.Q283*            | NA             | 3  | — | M | — | — | + | — | Lim (2013)(Lim et al., 2013)             |
|                              | c.3229C>T/p.Q1077*          | NA             | 15 | — | M | + | — | — | — | Grozeva (2015)(Grozeva et al., 2015)     |
| <b>Small deletions</b>       | c.527_528delGT/p.G176Afs*26 | maternal       | 3  | — | M | — | — | + | — | Yuen (2017)(RK et al., 2017)             |
| <b>Small insertions</b>      | c.523dupA/p.S175Kfs*28      | maternal       | 3  | — | M | — | — | + | — | Yuen (2017)(RK et al., 2017)             |
|                              | c.524_525insA/S175Rfs*28    | maternal       | 3  | — | M | — | — | + | — | Yuen (2017)(RK et al., 2017)             |
|                              | c.3663dupC/Ile1222Hisfs*8   | maternal       | 20 | — | M | — | — | + | — | Kosmicki (2017)(Kosmicki et al., 2017)   |
| <b>Genomic rearrangement</b> |                             |                |    |   |   |   |   |   |   |                                          |
| <b>Gross deletions</b>       | chrX:147.21_148.54          | <i>De novo</i> | —  | — | M | + | + | — | — | Willemsen (2012)(Willemsen et al., 2012) |

|                                                      |                |            |     |   |   |   |   |   |                                                      |
|------------------------------------------------------|----------------|------------|-----|---|---|---|---|---|------------------------------------------------------|
| ChrX:147,462,961-147,478,060_147,599,458-147,608,722 | maternal       | 3          | —   | M | + | — | + | — | Stettner (2011)(Stettner et al., 2011)               |
| chrX:147,478,059_147,718,495                         | maternal       | 2-4        | —   | M | + | + | — | — | Sahoo (2011)(Sahoo et al., 2011)                     |
| chrX:147,043,944_147,543,272                         | NA             | 1-3        | —   | M | + | + | — | — | Sahoo (2011)(Sahoo et al., 2011)                     |
| chrX: 147.7–148.6 Mb                                 | NA             | 7-11       | —   | M | + | + | — | — | Honda (2007)(Honda et al., 2007)                     |
| chrX:139,990,405–149,404,134                         | maternal       | Whole gene | NA  | M | + | + | — | + | Brusius-Facchin (2012)(Brusius-Facchin et al., 2012) |
| chrX:144,726,761–148,623,869                         | <i>De novo</i> | Whole gene | NA  | M | + | + | — | + | Brusius-Facchin (2012)(Brusius-Facchin et al., 2012) |
| DXS7536 proximally to <i>FMR2</i> distally           | <i>De novo</i> | Whole gene | NA  | M | + | + | — | + | Moore (1999)(Moore et al., 1999)                     |
| DXS984 proximally to DXS1193 distally                | maternal       | Whole gene | 5yr | M | + | + | — | + | Wolff (1997)(Wolff et al., 1997)                     |

|                             |                                                 |                |               |      |   |   |   |   |   |                                              |
|-----------------------------|-------------------------------------------------|----------------|---------------|------|---|---|---|---|---|----------------------------------------------|
|                             | DXS984 distally to <i>FMR2</i><br>distally      | <i>De novo</i> | Whole<br>gene | 18mo | F | + | + | − | + | Wolff<br>(1997)(Wolff et<br>al., 1997)       |
|                             | DXS312 proximally to<br>DXS1193 distally        | <i>De novo</i> | Whole<br>gene | 25mo | M | + | + | − | + | Albright<br>(1994)(Albright et<br>al., 1994) |
|                             | <i>IDS</i> up to part of <i>FMR2</i>            | NA             | NA            | NA   | M | + | + | − | + | Timms<br>(1997)(Timms et<br>al., 1997)       |
|                             | <i>IDS</i> up to <i>FMR2</i>                    | NA             | Whole<br>gene | NA   | M | + | + | − | + | Timms<br>(1997)(Timms et<br>al., 1997)       |
|                             | Out-of-frame deletion including<br>exon 2 and 3 | NA             | 2, 3          | −    | M | + | + | − | − | Gedeon<br>(1995)(Gedeon et<br>al., 1995)     |
|                             | <100 kb deletion, part of <i>FMR2</i>           | NA             | NA            | −    | M | + | − | − | − | Gedeon<br>(1995)(Gedeon et<br>al., 1995)     |
| <b>Gross<br/>insertions</b> | chrX:140,033,727_151,588,281                    | <i>De novo</i> | Whole<br>gene | −    | M | + | + | − | − | Isrie (2012)(Isrie<br>et al., 2012)          |
|                             | chrX:147,646,015_<br>147,837,382                | NA             | Whole<br>gene | NA   | M | + | − | − | + | Isrie (2012)(Isrie<br>et al., 2012)          |
|                             | chrX:147547319_147757141                        | NA             | 3-7           | −    | M | + | − | − | − | Whibley<br>(2010)(Whibley et<br>al., 2010)   |
| <b>Complex</b>              | 46,X,t(X;15)(q28;p11.2)                         | <i>De novo</i> | −             | −    | F | + | + | − | − | Honda                                        |

rearrangement

(2007)(Honda et al., 2007)

| CCG repeat variations                           |          |   |   |     |   |   |   |   |                                            |
|-------------------------------------------------|----------|---|---|-----|---|---|---|---|--------------------------------------------|
| (CCG)n, $\Delta > 650\text{bp}$ (2 families)    | maternal | — | — | M   | + | — | — | — | Knight (1993)(Knight et al., 1993)         |
| (CCG)n, $\Delta \geq 0.5\text{Kb}$ (6 families) | maternal | — | — | M/F | + | — | — | — | Mulley (1995)(Mulley et al., 1995)         |
| (CCG)n, $\Delta \geq 1.6\text{Kb}$ (1 family)   | maternal | — | — | M   | + | — | — | — | Carbonell (1996)(Carbonell et al., 1996)   |
| (CCG)n, $\geq 200$ repeats (4 family)           | maternal | — | — | M   | + | — | — | — | Biancalana (1996)(Biancalana et al., 1996) |
| (CCG)n, $\Delta \geq 1.0\text{Kb}$ (4 cases)    | maternal | — | — | M   | + | — | — | — | Knight (1996)(Knight et al., 1996)         |
| (CCG)n, $\Delta \geq 0.3\text{Kb}$ (1 family)   | maternal | — | — | M   | + | — | — | — | Mila (1997)(Mila et al., 1997)             |
| (CCG)n, $> 5.2\text{Kb}$ (2 families)           | maternal | — | — | M   | + | — | — | — | Abrams (1997)(Abrams et al., 1997)         |
| (CCG)n, $\Delta \geq 1.4\text{Kb}$ (3 families) | maternal | — | — | M   | + | — | — | — | Barnicoat (1997)(Barnicoat et al., 1997)   |

|                                                 |          |   |    |     |   |   |   |     |                                        |
|-------------------------------------------------|----------|---|----|-----|---|---|---|-----|----------------------------------------|
| (CCG)n, $\Delta \geq 1.0\text{Kb}$ (3 families) | maternal | — | —  | M   | + | — | — | —   | Gecz (1997)(Gecz et al., 1997)         |
| (CCG)n, $\Delta > 400\text{bp}$ (1 case)        | maternal | — | NA | M   | + | — | — | +   | Lo Nigro (2000)(Lo Nigro et al., 2000) |
| (CCG)n, $\geq 600$ repeats (1 family)           | maternal | — | NA | M/F | + | — | — | —/+ | Lesca (2003)(Lesca et al., 2003)       |

Abbreviations: ASD: autism spectrum disorder; GDD: global developmental delay; Ep: epilepsy; F: female; M: male; ID: intellectual disability; NA: not available;  $\Delta$ : the size of the increase above the baseline of CCG expansion fragments 5.2 kb.

## References

- Abrams, M. T., Doheny, K. F., Mazzocco, M. M., Knight, S. J., Baumgardner, T. L., Freund, L. S., et al. (1997). Cognitive, behavioral, and neuroanatomical assessment of two unrelated male children expressing FRAXE. *Am J Med Genet.* 74, 73-81. doi:10.1002/(sici)1096-8628(19970221)74:1<73::aid-ajmg16>3.0.co;2-o
- Albright, S. G., Lachiewicz, A. M., Tarleton, J. C., Rao, K. W., Schwartz, C. E., Richie, R., et al. (1994). Fragile X phenotype in a patient with a large de novo deletion in Xq27-q28. *Am J Med Genet.* 51, 294-297. doi:10.1002/ajmg.1320510403
- Barnicoat, A. J., Wang, Q., Turk, J., Green, E., Mathew, C. G., Flynn, G., et al. (1997). Clinical, cytogenetic, and molecular analysis of three families with FRAXE. *J Med Genet.* 34, 13-17. doi:10.1136/jmg.34.1.13
- Biancalana, V., Taine, L., Bouix, J. C., Finck, S., Chauvin, A., De Verneuil, H., et al. (1996). Expansion and methylation status at FRAXE can be detected on EcoRI blots used for FRAXA diagnosis: analysis of four FRAXE families with mild mental retardation in males. *Am J Hum Genet.* 59, 847-854.
- Brusius-Facchin, A. C., De Souza, C. F., Schwartz, I. V., Riegel, M., Melaragno, M. I., Correia, P., et al. (2012). Severe phenotype in MPS II patients associated with a large deletion including contiguous genes. *Am J Med Genet A.* 158A, 1055-1059. doi:10.1002/ajmg.a.35271
- Carbonell, P., Lopez, I., Gabarron, J., Bernabe, M. J., Lucas, J. M., Guitart, M., et al. (1996). FRAXE mutation analysis in three Spanish families. *Am J Med Genet.* 64, 434-440. doi:10.1002/(SICI)1096-8628(19960809)64:2<434::AID-AJMG40>3.0.CO;2-D
- Farwell, K. D., Shahmirzadi, L., El-Khechen, D., Powis, Z., Chao, E. C., Tippin Davis,



- B., et al. (2015). Enhanced utility of family-centered diagnostic exome sequencing with inheritance model-based analysis: results from 500 unselected families with undiagnosed genetic conditions. *Genet Med.* 17, 578-586. doi:10.1038/gim.2014.154
- Gecz, J., Oostra, B. A., Hockey, A., Carbonell, P., Turner, G., Haan, E. A., et al. (1997). FMR2 expression in families with FRAXE mental retardation. *Hum Mol Genet.* 6, 435-441. doi:10.1093/hmg/6.3.435
- Gedeon, A. K., Meinanen, M., Ades, L. C., Kaariainen, H., Gecz, J., Baker, E., et al. (1995). Overlapping submicroscopic deletions in Xq28 in two unrelated boys with developmental disorders: identification of a gene near FRAXE. *Am J Hum Genet.* 56, 907-914.
- Grozeva, D., Carss, K., Spasic-Boskovic, O., Tejada, M. I., Gecz, J., Shaw, M., et al. (2015). Targeted next-generation sequencing analysis of 1,000 individuals with intellectual disability. *Hum Mutat.* 36, 1197-1204. doi:10.1002/humu.22901
- Honda, S., Hayashi, S., Kato, M., Niida, Y., Hayasaka, K., Okuyama, T., et al. (2007). Clinical and molecular cytogenetic characterization of two patients with non-mutational aberrations of the FMR2 gene. *Am J Med Genet A.* 143A, 687-693. doi:10.1002/ajmg.a.31638
- Isrie, M., Froyen, G., Devriendt, K., de Ravel, T., Fryns, J. P., Vermeesch, J. R., et al. (2012). Sporadic male patients with intellectual disability: contribution of X-chromosome copy number variants. *Eur J Med Genet.* 55, 577-585. doi:10.1016/j.ejmg.2012.05.005
- Jiang, Y. H., Yuen, R. K., Jin, X., Wang, M., Chen, N., Wu, X., et al. (2013). Detection of clinically relevant genetic variants in autism spectrum disorder by whole-genome sequencing. *Am J Hum Genet.* 93, 249-263.

doi:10.1016/j.ajhg.2013.06.012

Knight, S. J., Flannery, A. V., Hirst, M. C., Campbell, L., Christodoulou, Z., Phelps, S. R., et al. (1993). Trinucleotide repeat amplification and hypermethylation of a CpG island in FRAXE mental retardation. *Cell*. 74, 127-134. doi:10.1016/0092-8674(93)90300-f

Knight, S. J., Ritchie, R. J., Chakrabarti, L., Cross, G., Taylor, G. R., Mueller, R. F., et al. (1996). A study of FRAXE in mentally retarded individuals referred for fragile X syndrome (FRAXA) testing in the United Kingdom. *Am J Hum Genet*. 58, 906-913.

Kosmicki, J. A., Samocha, K. E., Howrigan, D. P., Sanders, S. J., Slowikowski, K., Lek, M., et al. (2017). Refining the role of de novo protein-truncating variants in neurodevelopmental disorders by using population reference samples. *Nat Genet*. 49, 504-510. doi:10.1038/ng.3789

Lesca, G., Biancalana, V., Brunel, M. J., Quack, B., Calender, A., Lespinasse, J. (2003). Clinical, cytogenetic, and molecular description of a FRAXE French family. *Psychiatr Genet*. 13, 43-46. doi:10.1097/00041444-200303000-00007

Lim, E. T., Raychaudhuri, S., Sanders, S. J., Stevens, C., Sabo, A., MacArthur, D. G., et al. (2013). Rare complete knockouts in humans: population distribution and significant role in autism spectrum disorders. *Neuron*. 77, 235-242. doi:10.1016/j.neuron.2012.12.029

Lo Nigro, C., Faravelli, F., Cavani, S., Perroni, L., Novello, P., Vitali, M., et al. (2000). FRAXE mutation in a mentally retarded subject and in his phenotypically normal twin brother. *Eur J Hum Genet*. 8, 157-162. doi:10.1038/sj.ejhg.5200425

Mila, M., Sanchez, A., Badenas, C., Brun, C., Jimenez, D., Villa, M. P., et al. (1997).

- Screening for FMR1 and FMR2 mutations in 222 individuals from Spanish special schools: identification of a case of FRAXE-associated mental retardation. *Hum Genet.* 100, 503-507. doi:10.1007/s004390050542
- Mondal, K., Ramachandran, D., Patel, V. C., Hagen, K. R., Bose, P., Cutler, D. J., et al. (2012). Excess variants in AFF2 detected by massively parallel sequencing of males with autism spectrum disorder. *Hum Mol Genet.* 21, 4356-4364. doi:10.1093/hmg/dds267
- Moore, S. J., Strain, L., Cole, G. F., Miedzybrodzka, Z., Kelly, K. F., Dean, J. C. (1999). Fragile X syndrome with FMR1 and FMR2 deletion. *J Med Genet.* 36, 565-566.
- Mulley, J. C., Yu, S., Loesch, D. Z., Hay, D. A., Donnelly, A., Gedeon, A. K., et al. (1995). FRAXE and mental retardation. *J Med Genet.* 32, 162-169. doi:10.1136/jmg.32.3.162
- RK, C. Y., Merico, D., Bookman, M., J, L. H., Thiruvahindrapuram, B., Patel, R. V., et al. (2017). Whole genome sequencing resource identifies 18 new candidate genes for autism spectrum disorder. *Nat Neurosci.* 20, 602-611. doi:10.1038/nn.4524
- Sahoo, T., Theisen, A., Marble, M., Tervo, R., Rosenfeld, J. A., Torchia, B. S., et al. (2011). Microdeletion of Xq28 involving the AFF2 (FMR2) gene in two unrelated males with developmental delay. *Am J Med Genet A.* 155A, 3110-3115. doi:10.1002/ajmg.a.34345
- Stettner, G. M., Shoukier, M., Hoger, C., Brockmann, K., Auber, B. (2011). Familial intellectual disability and autistic behavior caused by a small FMR2 gene deletion. *Am J Med Genet A.* 155A, 2003-2007. doi:10.1002/ajmg.a.34122
- Timms, K. M., Bondeson, M. L., Ansari-Lari, M. A., Lagerstedt, K., Muzny, D. M., Dugan-Rocha, S. P., et al. (1997). Molecular and phenotypic variation in

patients with severe Hunter syndrome. *Hum Mol Genet.* 6, 479-486.  
doi:10.1093/hmg/6.3.479

Whibley, A. C., Plagnol, V., Tarpey, P. S., Abidi, F., Fullston, T., Choma, M. K., et al. (2010). Fine-scale survey of X chromosome copy number variants and indels underlying intellectual disability. *Am J Hum Genet.* 87, 173-188.  
doi:10.1016/j.ajhg.2010.06.017

Willemsen, M. H., de Leeuw, N., de Brouwer, A. P., PfunDT, R., Hehir-Kwa, J. Y., Yntema, H. G., et al. (2012). Interpretation of clinical relevance of X-chromosome copy number variations identified in a large cohort of individuals with cognitive disorders and/or congenital anomalies. *Eur J Med Genet.* 55, 586-598. doi:10.1016/j.ejmg.2012.05.001

Wolff, D. J., Gustashaw, K. M., Zurcher, V., Ko, L., White, W., Weiss, L., et al. (1997). Deletions in Xq26.3-q27.3 including FMR1 result in a severe phenotype in a male and variable phenotypes in females depending upon the X inactivation pattern. *Hum Genet.* 100, 256-261. doi:10.1007/s004390050501

Zhang, Y., Kong, W., Gao, Y., Liu, X., Gao, K., Xie, H., et al. (2015). Gene mutation analysis in 253 chinese children with unexplained epilepsy and intellectual/developmental disabilities. *PLoS One.* 10, e0141782.  
doi:10.1371/journal.pone.0141782
